## **Irisin Directly Stimulates Osteoclastogenesis and Bone Resorption *In Vitro* and *In Vivo***

Eben G. Estell<sup>1</sup>, Phuong T. Le<sup>1</sup>, Yosta Vegting<sup>1</sup>, Hyeonwoo Kim<sup>2</sup>, Roland Baron<sup>3</sup>, Bruce Spiegelman<sup>2</sup>, Clifford J. Rosen<sup>1\*</sup>

<sup>1</sup>Maine Medical Center Research Institute, 81 Research Drive, Scarborough, ME, 04074

<sup>2</sup>Dana Farber Cancer Institute, 450 Brookline Avenue, Boston, MA, 02215

<sup>3</sup>Harvard School of Dental Medicine, 188 Longwood Avenue, Boston, MA, 02115

\*Corresponding Author: Clifford J. Rosen

Email: [rosenc@mmc.org](mailto:rosenc@mmc.org) Phone: 207-396-8157

This manuscript is submitted to eLife as a **Short Report**

**Abstract.** The myokine irisin facilitates muscle-bone crosstalk and skeletal remodeling in part by its action on osteoblasts and osteocytes. In the current study we investigated whether irisin also directly regulates osteoclasts. *In vitro*, irisin (2-10 ng/mL) increased osteoclast differentiation in C57BL/6J bone marrow progenitors; this increase was blocked by a neutralizing antibody to integrin  $\alpha_v\beta_5$ . Irisin also increased resorption on several substrates *in situ*. RNAseq revealed differential gene expression induced by irisin including upregulation of markers for osteoclast differentiation and resorption, as well as osteoblast-stimulating ‘clastokines’. *In vivo*, forced expression of the irisin precursor *Fndc5* in murine muscle resulted in low bone mass and increased number of osteoclasts. Taken together, our work demonstrates that irisin acts directly on cultured osteoclast progenitors to increase differentiation and promote bone resorption. These actions support the tenet that irisin not only stimulates bone remodeling but may also be an important counter-regulatory hormone during exercise.

1           **Introduction.** Irisin is a peptide generated by proteolytic cleavage of fibronectin type III domain-containing  
2 protein 5 (FNDC5), a membrane-bound protein highly expressed in skeletal muscle. *Fndc5* expression increases in  
3 response to acute bouts of exercise under regulation by PGC-1 $\alpha$ , leading to a burst of circulating irisin<sup>1</sup>. Initially irisin  
4 was described as a circulating hormone that induces thermogenesis in adipose tissue<sup>2</sup>, but more recent work has shown  
5 a potent ability to modulate bone turnover. These effects support the tenet that irisin may be a key mediator of muscle-  
6 bone crosstalk during exercise. Initial studies demonstrated that irisin enhanced cortical bone formation and prevented  
7 unloading-induced bone loss *in vivo*, and stimulated osteoblasts *in vitro*<sup>3-5</sup>. Conversely, genetic deletion of *Fndc5* was  
8 separately shown to block resorption-driven bone loss and maintain osteocyte function following ovariectomy; irisin  
9 treatment *in vitro* also prevented osteocyte apoptosis and stimulated sclerostin and RANKL release, key promoters of  
10 osteoclastogenesis, through the  $\alpha_v\beta_5$  integrin receptor<sup>6</sup>. The present study addresses the hypothesis that irisin also  
11 directly stimulates osteoclast differentiation and function *in vitro* and *in vivo*.

12  
13           **Results and Discussion.** First, we used continuous treatment with increasing doses of irisin (0, 2, 5, 10  
14 ng/mL) for 7-days in an *in vitro* osteoclast differentiation assay using primary marrow hematopoietic progenitors.  
15 These doses were based on previous work establishing the physiologic range of circulating irisin during and after  
16 exercise<sup>1</sup>. We found a qualitative enhancement of both osteoclast number and size (Figure 1a), and significant  
17 increases in osteoclast number across this dose range (2 ng/mL, 5 ng/mL, 10 ng/mL:  $P < .0001$ , 20 ng/mL:  $P = .044$ )  
18 (Figure 1b). Based on these results, we selected 10 ng/mL irisin for further experiments using both continuous (7 day)  
19 and transient treatment for the first 4 or 24 hr of culture. Both transient treatments led to enhanced osteoclast numbers  
20 versus controls (4 hr:  $P = .0218$ , 24 hr:  $P = .0008$ ) (Figure 1c), but continuous irisin resulted in the largest increase ( $P$   
21  $< .0001$ ) and was higher than both 4 hr ( $P = .0002$ ) and 24 hr only treatments ( $P = .0152$ ). The stimulatory effect of  
22 continuous 10 ng/mL irisin was then further confirmed in primary hematopoietic cells from both sexes of C57BL/6J  
23 mice ( $P = .0003$ ), and in the RAW 264.7 macrophage cell line ( $P = .0428$ ) (Figure 1d). RAW-derived osteoclasts  
24 appeared morphologically similar to primary cells and mirrored observations of qualitatively larger cells with irisin  
25 treatment (Figure 1e).

26           As integrins are found on the osteoclast membrane and known to play a role in differentiation<sup>7,8</sup>, and earlier  
27 work identified integrin  $\alpha_v\beta_5$  as a receptor for irisin on osteocytes<sup>6</sup>, we examined the expression of both subunits in

28 osteoclast cultures and found increased relative mRNA expression above controls with irisin treatment ( $\alpha_V$ :  $P = .552$ ,  
 29  $\beta_5$ :  $P = .031$ ) (Figure 1f). Blocking integrin  $\alpha_V\beta_5$  with a neutralizing antibody (AVB5-AB) resulted in no differences  
 30 in osteoclast number per well for irisin treatment (10 ng/ml) versus untreated controls ( $P = .79$ ) compared to significant  
 31 increases with an IgG antibody control ( $P = .012$ ) or no-antibody conditions ( $P = .0295$ ) (Figure 1g) (Supplementary  
 32 File 1A), indicating this integrin as the receptor for irisin on osteoclasts.

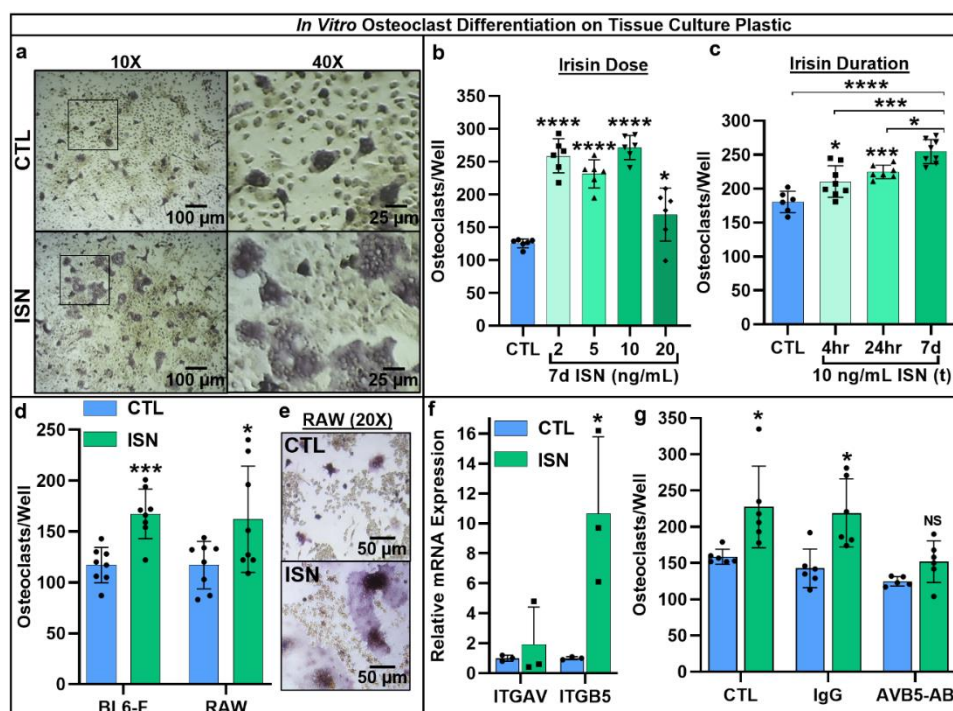

33  
 34 **Figure 1.** Representative 10X and 40X (boxed inset) images of TRAP-positive stained osteoclasts after 7-day  
 35 differentiation with 10 ng/mL irisin (ISN) or untreated controls (CTL) (a). Quantification of osteoclasts per well  
 36 demonstrating enhanced osteoclastogenesis in response to continuous (7d) ISN across a physiologic range (2-20  
 37 ng/mL) (b), and to treatment with 10 ng/mL ISN for only first 4 or 24 hr of culture compared to continuous treatment  
 38 or CTL (c). Quantification of osteoclasts per well confirming irisin stimulation of osteoclastogenesis with continuous  
 39 10 ng/mL treatment across primary murine gender with female BL6 mice, and with the macrophage cell line RAW  
 40 264.7 (d), with representative images of differentiated RAW-derived osteoclasts (e). Expression of integrin receptor  
 41 subunit  $\alpha_V$  (ITGAV) and  $\beta_5$  (ITGB5) in primary osteoclast cultures normalized to *Hprt* (f), and quantification of  
 42 osteoclast per well counts for CTL or continuous 10 ng/mL ISN in the presence of integrin  $\alpha_V\beta_5$  neutralizing antibody  
 43 (AVB5-AB), an IgG antibody control (IgG), or no antibody (CTL) (g).  $N = 3-8$  wells/group,  $*P < .05$ ,  $**P < .01$ ,  
 44  $***P < .001$ ,  $****P < .0001$  vs. CTL within group or as indicated.

45

46 Next, we asked whether irisin-induced osteoclastogenesis led to enhanced bone resorption. Osteoclast  
 47 differentiation cultures were performed on a variety of native and synthetic substrates with and without irisin (10  
 48 ng/mL). TRAP-positive osteoclasts were observed *in situ* on dentin slices after 7 days, and subsequent toluidine blue  
 49 staining revealed a qualitative increase in resorption pit area on the surface with irisin treatment (Figure 2a). Irisin  
 50 significantly increased osteoclast numbers on dentin ( $P = .013$ ), as well as total resorption area ( $P = .045$ ). When  
 51 normalized by osteoclast number however, resorption was not significantly different ( $P > .99$ ), indicating a dominant  
 52 effect of cell number in increasing total resorption (Figure 2b). Irisin enhancement of total resorption was further  
 53 confirmed via the Corning OsteoAssay, with a similar significant increase in total resorption area ( $P = .048$ ) (Figure  
 54 2c). Release of carboxy-terminal collagen crosslinks (CTX) from osteoclast cultures on collagen substrates was  
 55 measured to assess the effect of transient irisin treatment on resorption at earlier stages in culture, and was significantly  
 56 increased with both continuous ( $P = .0153$ ) and 24 hr ( $P < .0001$ ) irisin exposure, with transient treatment also  
 57 significantly higher than continuous ( $P = .0041$ ) (Figure 2d) (Supplementary File 1B).

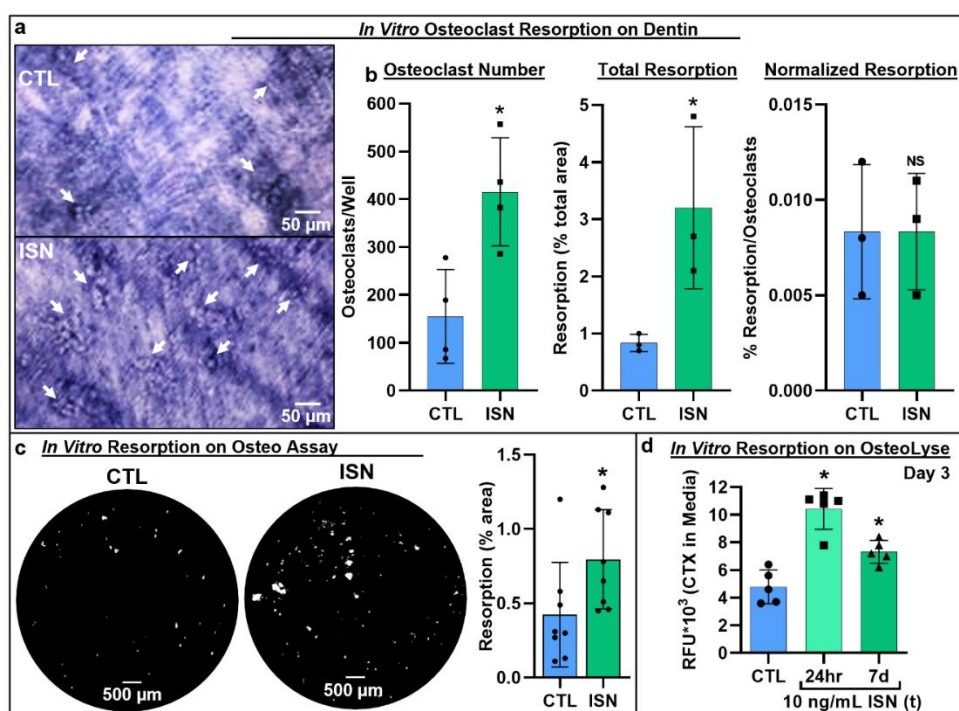

58  
 59 **Figure 2.** Representative images of resorption pits on dentin after 7-day osteoclast culture stained via toluidine blue  
 60 dye, demonstrating both increased resorption with irisin treatment (ISN) versus untreated controls (CTL) (a), with  
 61 quantification of osteoclast number, total resorption area, and resorption normalized to osteoclast number (b).  
 62 Confirmation of irisin stimulation of resorption on Corning OsteoAssay calcium phosphate substrate, representative

63 full-diameter images of 96 well plates with binary threshold to visualize resorption pits on Von Kossa-stained  
64 substrate after 7-day osteoclast culture for ISN vs. CTL, with quantification of total resorption by percent area (c).  
65 Irisin stimulation early-stage resorption with transient treatment for first 24 hr alone, versus continuous ISN and CTL;  
66 quantification of resorption as determined by ELISA of CTX release into media, collected at day 3 of culture (d). N  
67 = 4-8/group, \* $P < .05$  vs. CTL.

68

69 To determine the key signaling pathways of irisin induced osteoclastogenesis we performed an unbiased  
70 analysis of RNA sequencing (RNAseq) data from irisin-treated and control hematopoietic progenitors, which  
71 demonstrated a qualitatively differential gene expression pattern as typified by hierarchical clustering, volcano plot,  
72 and principal component analysis (Figure 3a). Irisin treatment significantly increased expression of the resorption  
73 markers *Adamts5* ( $P = .0381$ ) and *Loxl2* ( $P = .009$ ), and markers for secreted clastokines known to stimulate  
74 osteoblasts: *Postn* ( $P = .0002$ ), *Igfbp5* ( $P = .03$ ), *Tgfb2* ( $P = .0073$ ), and *Sparc* ( $P = .0365$ ). Significant decreases in  
75 expression of the macrophage markers *Mst1r* ( $P = .0416$ ) and *Itgax* ( $P < .0001$ ) and the lymphocyte markers *Cd72* ( $P$   
76 =  $.0086$ ), *Slamf8* ( $P = .0052$ ), and *H2-aa* ( $P = .0017$ ) indicated a preferential shift of the hematopoietic progenitor  
77 lineage toward osteoclast differentiation (Supplementary File 1C). RT-qPCR further showed that irisin significantly  
78 increased expression of key differentiation markers, namely *Rank*, the receptor for RANKL ( $P = .019$ ), *c-src* ( $P =$   
79  $.008$ ), *Fam102a* ( $P = .039$ ), *Nrf2* ( $P = .0008$ ), and the osteoclast fusion markers *Dcstamp* ( $P = .0039$ ) and *Atp6vod2*  
80 ( $P = .012$ ). Other early markers of osteoclast differentiation such as *Cfos* ( $P = .41$ ), *Itgb3* ( $P = .09$ ), *Nfatc* ( $P = .11$ ),  
81 *Rela* ( $P = .12$ ), and *Rgs12* ( $P = .09$ ) were slightly but not significantly increased. Significant increases were confirmed  
82 for both key resorption markers: *Acp5* ( $P = .012$ ) and *Loxl2* ( $P = .035$ ), and clastokine markers: *Sparc* ( $P = .009$ ) and  
83 *Wnt10a* ( $P = .047$ ) (Figure 3b) (Supplementary File 1D).

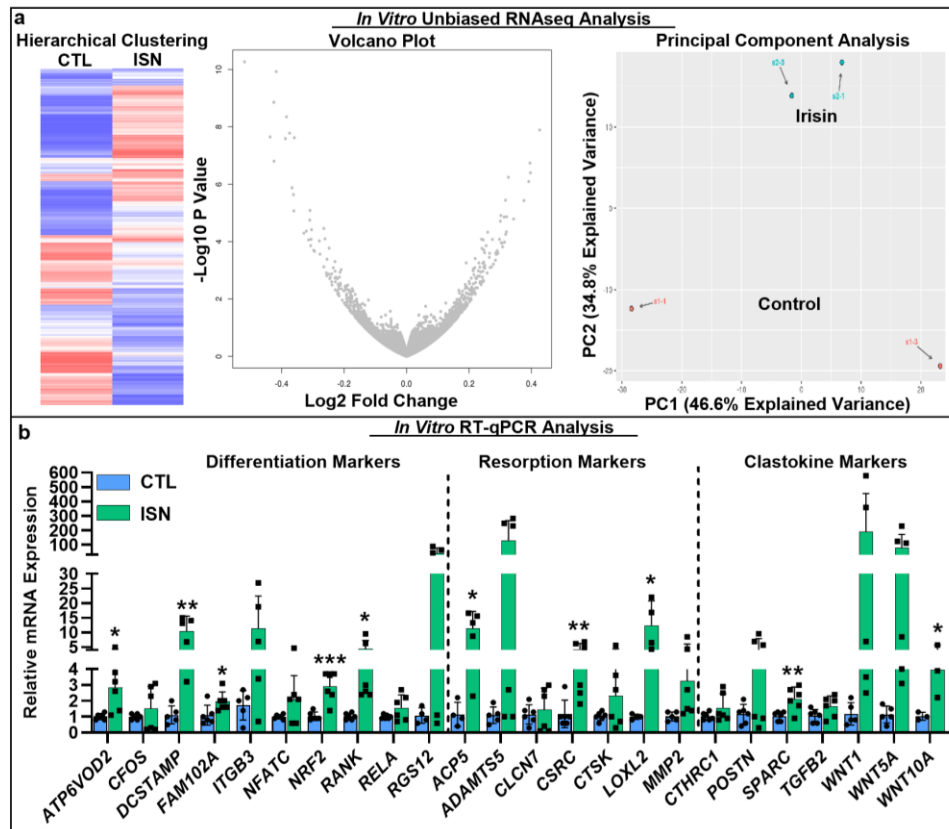

84

85 **Figure 3.** RNAseq analysis of differential gene expression patten induced irisin treatment (ISN) compared to untreated  
 86 controls (CTL), as typified by representative sample hierarchical clustering, volcano plot, and principal component  
 87 analysis (a). Relative mRNA expression quantified by RT-qPCR of markers for osteoclast differentiation, resorption,  
 88 and clastokines in irisin treated osteoclasts (ISN) compared to untreated controls (CTL), normalized to *Hprt* expression  
 89 (b). N = 3-6 samples/group. \*P < 0.05, \*\*P < 0.01, \*\*\*P < 0.001 vs. CTL within gene.

90

91 We next turned to a genetic model of forced expression of *Fndc5* in C57BL/6J mice using the muscle specific  
 92 promoter *Mck*. At 4.5 months there was a marked reduction in cortical area, and a significant decrease in trabecular  
 93 bone volume fraction compared to littermate controls ( $P = .012$ ) (Figure 4a). Dynamic histomorphometry  
 94 demonstrated similar decreases in overall bone volume fraction and trabecular thickness, and increased osteoclast  
 95 numbers on the trabecular bone surface (Figure 4b). RT-qPCR analysis of whole bones demonstrated a significant  
 96 increase in *Fndc5* ( $P < .0001$ ), indicating promoter activity in the marrow in addition to muscle, and the osteoclast  
 97 differentiation markers *Nfkb* ( $P = .0448$ ) in transgenic versus wild type mice. Primary bone marrow progenitors from  
 98 these mice had greater osteoclastogenic potential compared to wild type and yielded significantly higher numbers of

99 osteoclasts that were qualitatively larger than controls during *in vitro* differentiation ( $P < .0001$ ) (Figure 4d)  
 100 (Supplementary File 1E).

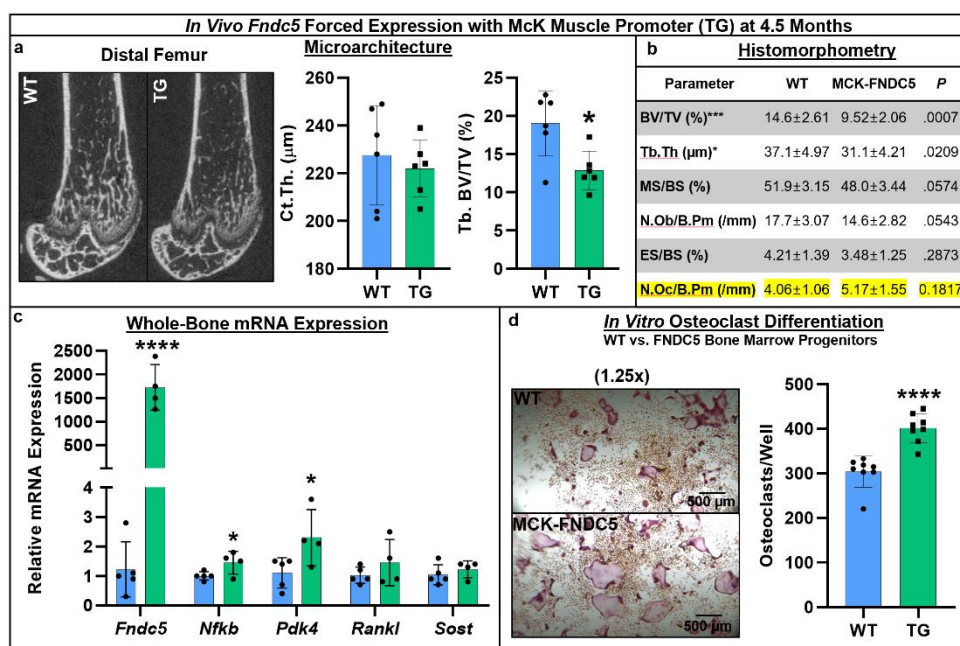

101  
 102 **Figures 4:** Skeletal phenotype and osteoclastogenic potential of *Fndc5* forced expression with McK muscle promoter  
 103 mice (MCK-FNDC5) compared to wild type C57BL/6J controls (WT; N = 5/genotype). Representative distal femur  
 104 microarchitecture at 4.5 months demonstrates qualitatively reduced cortical thickness, with quantification of  
 105 significantly reduced trabecular and cortical bone parameters (a). Tibial and vertebral histomorphometry at 4.5 months  
 106 demonstrates continued reduction of bone volume fraction, with a non-significant increase in osteoclast numbers in  
 107 the tibia (b). While whole bone gene expression shows increased *Fndc5*, as well as promoters of osteoclast  
 108 differentiation, *Nfkb*, *Pdk4*, *Rankl*, and *Sost* as normalized to *Hprt* (c). In vitro MCSF/RANKL-induced osteoclast  
 109 differentiation from bone marrow progenitors yielded higher osteoclast numbers in MCK-FNDC5 vs. WT (d). N = 4-  
 110 8, \* $P < .05$ , \*\*\* $P < .001$ , \*\*\*\* $P < .0001$  vs. WT.

111  
 112 The present study demonstrates that irisin plays an important role in regulating bone remodeling not only by  
 113 stimulating osteoblasts and osteocytes, but also by directly acting on osteoclasts to promote differentiation and  
 114 resorption. This stimulatory effect was observed across multiple experiments with primary murine progenitors and the  
 115 RAW 264.7 macrophage cell line and occurred with either intermittent or continuous irisin exposure across a range  
 116 of physiologic concentrations previously reported in humans<sup>1</sup>. Analogous to its action on osteocytes, we confirmed  
 117 expression of integrin subunits  $\alpha_v$  and  $\beta_5$  expression on osteoclasts and identified it as a candidate receptor for irisin,

118 particularly since blocking this receptor complex with a neutralizing antibody completely suppressed the stimulatory  
119 effect of irisin on osteoclastogenesis (Figure 1). Furthermore, we found that both recruitment and differentiation of  
120 more osteoclast progenitors with irisin treatment appeared to be the driving factors in enhanced bone resorption, based  
121 on *in situ* studies on native dentin as well as synthetic calcium phosphate and collagen substrates (Figure 2). Using  
122 unbiased RNAseq analysis and qRT-PCR of irisin-treated osteoclasts we noted that some markers of early osteoclast  
123 differentiation, nuclear fusion markers, and enzymes related to bone resorption were upregulated, matching the  
124 functional effects observed *in vitro*. In addition, several osteoclast-secretory factors known to stimulate osteoblasts  
125 were significantly upregulated, suggesting that the direct actions of irisin on this cell type may have further impact on  
126 cell signaling to enhance coupled remodeling (Figure 3).

127 To confirm the capacity of irisin to impact osteoclast function *in vivo*, we employed a genetic strategy with  
128 chronically forced expression of *Fndc5* using the muscle specific *Mck* promoter. Using that mouse model both *in vivo*  
129 and *in vitro* we demonstrated that high levels of irisin can drive osteoclastogenesis, although we cannot not exclude  
130 an indirect effect from osteocytic activation to drive resorption, despite the absence of increased *Rankl* or *Sost*  
131 expression (Figure 4). While further studies are necessary to fully elucidate the mechanisms of irisin actions on bone,  
132 the present work adds to previous studies demonstrating this myokine's ability to both act directly on bone cells of  
133 distinct origin, and to modulate signaling from one cell type to one another. This may have major physiologic  
134 relevance since one acute effect of intense physical activity is a decrease in serum calcium, followed by a secondary  
135 rise in parathyroid hormone<sup>9</sup>. In the context of our experimental paradigm, it is conceivable that irisin represents  
136 another but more acute counter-regulatory hormone that works during the first minutes of exercise to tightly maintain  
137 serum calcium levels by its direct actions on osteoclasts and through osteocytic osteolysis. Taken together, our studies  
138 provide more evidence that irisin mediates muscle-bone cross talk by regulating bone remodeling.

139

140 **Methods. Primary Osteoclast Culture.** Primary murine osteoclasts were differentiated and cultured *in vitro*  
141 by the following methods. Bone marrow was collected via centrifugation from the femur and tibia of 8-week-old male  
142 C57BL6/J mice and cultured in  $\alpha$ MEM (VWR, Radnor, PA, USA) supplemented with 10% fetal bovine serum VWR)  
143 and 1% Pen-Strep (VWR). After 48 hr, non-adherent hematopoietic progenitor cells were removed and plated at  
144  $1.563 \times 10^5$  cell/cm<sup>2</sup> in 96-well tissue culture plates for cell counting or in 12-well tissue culture plates for RNA



145 extraction. Osteoclast differentiation was stimulated by supplementation with 30 ng/mL M-CSF (PeproTech, Rocky  
146 Hill, NJ, USA) and 100 ng/mL RANKL (PeproTech)<sup>10</sup>, with 200  $\mu$ L or 2 mL media refreshed at days 3 and 5 after  
147 plating for 96 and 12 well plates respectively. Irisin was produced in HEK 293 cells as a 10 his-tag recombinant, via  
148 previously established protocols (Lake Pharma, Hopkinton, MA, USA)<sup>6</sup>, and supplemented continuously in the media  
149 at 10 ng/mL, or as otherwise indicated.

150 *Primary Source Gender and Cell Line Confirmations.* 8-week-old male C57BL6/J mice were used as the  
151 primary cell source for all experiments unless otherwise stated. Confirmation of irisin effect on osteoclastogenesis  
152 was also established in female C57BL6/J mice to compare gender among this wild type murine primary source of  
153 progenitors, which were cultured and counted as described. Additionally, the RAW 267.4 macrophage cell line  
154 (ATTC, Manassas, VA, USA) was employed as a non-primary cell source, following previously published protocols  
155 for osteoclast differentiation from this cell line<sup>11,12</sup>. Briefly, RAW cells were played at a lower density in 96-well  
156 plates of  $6 \times 10^3$  cells/well and cultured as described, but for the exclusion of MCSF in the media.

157 *Osteoclast Counts.* At day 7, 96-well plates were fixed in 10% formalin and stained for TRAP (Acid  
158 Phosphatase Kit, Sigma-Aldrich, St. Lois, MO, USA) to visualize and count mature osteoclast numbers, where a  
159 TRAP-positive cell with 3 or more nuclei was defined as an osteoclast. Initial counting was performed via manual  
160 counting on an inverted microscope, with confirmative counts performed by manually counting blinded copies of  
161 composite images of each sample in ImageJ (Blind Analysis, Labcode).

162 *Integrin Antibody Blocking.* A separate experiment employed the culture and counting methods described  
163 above for irisin treatment in combination with a neutralizing antibody for integrin  $\alpha_v\beta_5$  (Anti-Integrin  $\alpha_v\beta_5$ ,  
164 MilliporeSigma, Burlington, MA, USA) and an IgG control (Mouse IgG1 Isotype Control, R&D Systems,  
165 Minneapolis, MN, USA), each supplied continuously in the media during the 7 day culture at 0.9  $\mu$ g/ml.

166 *Resorption Assays.* Multiple resorption assays were utilized to characterize and confirm the effect of irisin  
167 treatment on osteoclast resorptive capacity. The primary approach employed decellularized dentin slices as a native  
168 bone substrate. Hematopoietic progenitors were plated on the bone slices at  $3 \times 10^5$  cell/cm<sup>2</sup> in a 50  $\mu$ L place on top of  
169 slice in a 10 mm petri dish and incubated for 30 minutes to facilitate cell adhesion to the substrate alone. Slices were  
170 then moved into 96-well plates and cultured as described above. At day 7, dentin slices were TRAP stained and imaged

171 as described for osteoclast counts, then sonicated briefly to removed cells and stained with toluidine blue to visualize  
172 resorption pits by previously published methods<sup>13</sup>. Briefly, each slice was placed face-down on a 20  $\mu$ L drop of 1%  
173 toluidine blue solution (in 1% sodium borate 10-hydrate solution with distilled water) for four minutes and then rinsed  
174 and allowed to air-dry prior to imaging and manual calculation of total pit areas for blinded images in ImageJ.  
175 Confirmation experiments were performed with the OsteoAssay resorption assay (Corning Inc., Corning, NY, USA),  
176 whereby osteoclasts were cultured on the substrate treated 96-well plates by the previously described methods, then  
177 removed with 10% bleach and the substrate was stained with Von Kossa stain (Sigma-Aldrich). Imaging of the wells  
178 on a dissecting scope with backlighting allowed visualization of pits, and automated area calculations based on binary  
179 thresholded masks of the images. To determine earlier time-point resorption, the OsteoLyse assay (Lonza, Basel,  
180 Switzerland) was employed, utilizing the same osteoclast culture methods on a collagen substrate, whereby detection  
181 of carboxy-terminal collagen crosslinks (CTX) allows for relative quantification of degraded collagen as an indicator  
182 of resorptive activity. Aliquots of the media at day 3 in culture were analyzed via ELISA for relative fluorescence  
183 indicative of CTX release and normalized to undifferentiated and no-cell controls.

184 *Gene Expression Analysis.* Total RNA was isolated from osteoclast cells at day 7 with the Trizol reagent  
185 (ThermoFisher, Waltham, MA) and RNeasy mini kit (Qiagen, Hilden, Germany), with mRNA enrichment from 100  
186 ng of total purified RNA and Illumina sequencing libraries preparation performed using Kapa stranded mRNA Hyper  
187 Prep (Roche Sequencing Solutions, Pleasanton, CA, USA). Gene libraries were multiplexed in an equimolar pool and  
188 were sequenced on an Illumina NextSeq 500 with single-end 75 bp reads. Raw reads were aligned to the UCSC mm10  
189 reference genome using a STAR aligner<sup>14</sup> (version STAR\_2.4.2a), and raw gene counts were quantified using the  
190 quantMode GeneCounts flag. Differential expression testing was performed using Limma<sup>15</sup> and DESeq2<sup>16</sup>. RNAseq  
191 analysis was performed using the VIPER snakemake pipeline<sup>17</sup>. Follow-up RT-qPCR was performed on RNA from a  
192 separate set of osteoclasts for markers identified via RNAseq and additional targets for differentiation, resorption, and  
193 clastokines with primer sequences obtained PrimerBLAST (NCBI-NIH), using reverse transcriptase kit (Qiagen) and  
194 AzuraQuant Green Fast PCR Mix (Azura Genomics, Rynam, MA, USA) with an IQ PCR detection system (Bio-Rad,  
195 Hercules, CA, USA). Gene expression data were analyzed via the comparative Ct method, utilizing *Hprt* as the  
196 housekeeping gene and normalizing by untreated control mean Ct.

197 *Forced Expression of Fndc5 in Murine Muscle.* Transgenic C57BL/6J mice with forced expression of *Fndc5*  
198 were generated and generously gifted by Dr. Eric Elson of UT Southwestern. The *Mck* promoter was utilized as  
199 previously demonstrated to induce skeletal muscle-specific forced expression of *Fndc5*<sup>18</sup>. Microarchitecture of distal  
200 trabecular bone and midshaft cortical bone was analyzed at 4.5 months by  $\mu$ CT and static and dynamic  
201 histomorphometry, with measures performed and analyzed according to standard nomenclatures. Additional femur  
202 and tibia were pulverized, and RNA extraction and subsequent gene expression analysis was performed via  
203 aforementioned protocols. Bone marrow isolation and *in vitro* osteoclast cultures were performed via previously  
204 described protocols. All experiments were conducted with 6 age-matched female mice.

205 *Experimental Design and Data Analysis.* Isolation of primary murine bone marrow was conducted by pooling  
206 tissue from the maximum available number of same-gender littermates (3-5). For *in vitro* cultures, the adequate  
207 number of biological replicates (replicate wells in a tissue culture plastic plate, or slices of dentin) was determined via  
208 power analyses based on preliminary data ( $\alpha = .05$ , Power = 0.8) as 6, and so osteoclast counting and resorption  
209 experiments were conducted in triplicate with representative experiments shown, with 6-8 replicate wells per group  
210 in each experiment. Similarly, gene expression analysis via RT-qPCR was conducted for duplicate repeat experiments  
211 with three biological replicates per group and two technical replicates (replicate wells read per sample and averaged),  
212 with pooled representative data for a sample number of 6. Due to limitations in the availability of dentin slices, this  
213 resorption experiment was conducted once with a sample size of 5 per group. Similarly, RNA sequencing analysis  
214 was performed on a separate experimental set with three biological replicates per group. For characterization of the  
215 *Fndc5*-transgenic mouse, power analyses based on previous outcome metrics from histomorphometry and gene  
216 expression in the *Fndc5*-null mouse experiments<sup>6</sup> ( $\alpha=0.05$ , Power=0.8) indicated a n adequate sample size of 6 mice  
217 per group, which was employed for *in vivo* characterization of bone properties based on the availability of same-  
218 gender age-matched mice, while *in vitro* culture of osteoclast progenitors from these mice were carried out with bone  
219 marrow isolates from maximal number of same-gender littermates (3-5) and 8 replicate wells of osteoclast  
220 differentiation cultures per group.

221 For statistical analysis, outlier identification was first performed via Grubb's test with  $\alpha = .05$ . Based on  
222 recommended guidelines for analysis, comparisons between two groups alone (irisin vs. control osteoclast counts,  
223 resorption, gene expression) was conducted via unpaired, two-tailed t-test,  $P < .05$ , while multiple group comparisons

224 were made via ordinary one-way (irisin dose and duration versus control) or two-way (antibody/irisin treatment  
225 osteoclast counts) ANOVA with Tukey post-hoc analysis and  $P < .05$ . RNA sequencing data analysis was performed  
226 as described above with statistical significance via Wald test with Benjamini-Hochberg adjustment. Quantitative data  
227 are represented graphically as mean  $\pm$  standard deviation with individual values overlaid.

228

229 **Acknowledgments.** This work was funded in part by NIH/NIAMS F32AR077382, NIH U19AG060917, NIH  
230 U54GM115516-01A1, NIH/NIDDK R01 DK112374, and NIH/NIGMS 1P20GM121301. We thank Zach Herbert,  
231 Maura Berkeley and Andrew Caruso from the Molecular Biology Core Facilities at the Dana-Farber Cancer Institute  
232 for RNAseq. We thank Dr. Eric Elson of UT Southwestern for providing the transgenic *Fndc5* mice.

233

234 **Competing Interests.** The authors have no conflicts of interests to disclose.

235 **References**

- 236 1 Jedrychowski, M. P. *et al.* Detection and Quantitation of Circulating Human Irisin by Tandem  
237 Mass Spectrometry. *Cell Metab* **22**, 734-740, doi:10.1016/j.cmet.2015.08.001 (2015).
- 238 2 Bostrom, P. *et al.* A PGC1-alpha-dependent myokine that drives brown-fat-like development of  
239 white fat and thermogenesis. *Nature* **481**, 463-468, doi:10.1038/nature10777 (2012).
- 240 3 Colaianni, G. *et al.* Irisin enhances osteoblast differentiation in vitro. *Int J Endocrinol* **2014**,  
241 902186, doi:10.1155/2014/902186 (2014).
- 242 4 Colaianna, G. *et al.* The myokine irisin increases cortical bone mass. *PNAS* **112**, 12157-12162,  
243 doi:10.1073/pnas.1519137112 (2015).
- 244 5 Colaianni, G. *et al.* Irisin prevents and restores bone loss and muscle atrophy in hind-limb  
245 suspended mice. *Sci Rep* **7**, 2811, doi:10.1038/s41598-017-02557-8 (2017).
- 246 6 Kim, H. *et al.* Irisin Mediates Effects on Bone and Fat via  $\alpha$ V Integrin Receptors. *Cell* **175**, 1756–  
247 1768, doi:10.1016/j.cell.2018.10.025 (2018).
- 248 7 Duong, L. T., Lakkakorpi, P., Nakamura, I. & Rodan, G. A. Integrins and signaling in osteoclast  
249 function. *Matrix Biology* **19**, 97-105, doi:[https://doi.org/10.1016/S0945-053X\(00\)00051-2](https://doi.org/10.1016/S0945-053X(00)00051-2)  
250 (2000).
- 251 8 Yavropoulou, M. P. & Yovos, J. G. Osteoclastogenesis - Current knowledge and future  
252 perspectives. *J Musculoskelet Neuronal Interact* **8**, 204-216 (2008).
- 253 9 Kohrt, W. M. *et al.* Maintenance of Serum Ionized Calcium During Exercise Attenuates  
254 Parathyroid Hormone and Bone Resorption Responses. *J Bone Miner Res* **33**, 1326-1334,  
255 doi:10.1002/jbmr.3428 (2018).
- 256 10 Marino, S., Logan, J. G., Mellis, D. & Capulli, M. Generation and culture of osteoclasts. *Bonekey*  
257 *Rep* **3**, 570, doi:10.1038/bonekey.2014.65 (2014).
- 258 11 Ng, A. Y. *et al.* Comparative Characterization of Osteoclasts Derived From Murine Bone Marrow  
259 Macrophages and RAW 264.7 Cells Using Quantitative Proteomics. *JBMR Plus* **2**, 328-340,  
260 doi:10.1002/jbm4.10058 (2018).
- 261 12 Bharti, A. C., Takada, Y. & Aggarwal, B. B. Curcumin (Diferuloylmethane) Inhibits Receptor  
262 Activator of NF- $\kappa$ B Ligand-Induced NF- $\kappa$ B Activation in Osteoclast Precursors and Suppresses  
263 Osteoclastogenesis. *The Journal of Immunology* **172**, 5940-5947,  
264 doi:10.4049/jimmunol.172.10.5940 (2004).
- 265 13 Vesprey, A. & Yang, W. Pit Assay to Measure the Bone Resorptive Activity of Bone Marrow-  
266 derived Osteoclasts. *Bio Protoc* **6**, doi:10.21769/BioProtoc.1836 (2016).
- 267 14 Dobin, A. *et al.* STAR: ultrafast universal RNA-seq aligner. *Bioinformatics* **29**, 15-21,  
268 doi:10.1093/bioinformatics/bts635 (2013).
- 269 15 Ritchie, M. E. *et al.* Limma powers differential expression analyses for RNA-sequencing and  
270 microarray studies. *Nucleic Acids Research* **43**, e47-e47, doi:10.1093/nar/gkv007 (2015).
- 271 16 Love, M. I., Huber, W. & Anders, S. Moderated estimation of fold change and dispersion for  
272 RNA-seq data with DESeq2. *Genome Biology* **15**, doi:10.1186/s13059-014-0550-8 (2014).
- 273 17 Cornwell, M. *et al.* VIPER: Visualization Pipeline for RNA-seq, a Snakemake workflow for efficient  
274 and complete RNA-seq analysis. *BMC Bioinformatics* **19**, doi:10.1186/s12859-018-2139-9 (2018).
- 275 18 Lin, J. *et al.* Transcriptional co-activator PGC-1 $\alpha$  drives the formation of slow-twitch muscle  
276 fibres. *Nature* **418**, 797-801, doi:10.1038/nature00904 (2002).

277
